# Supplementary material for: A first-principles investigation of the effect of Pt cluster size on CO and NO oxidation intermediates and energetics
Source: Royal Society of Chemistry journal article supplement (doi:10.1039/b805179h), 2008-01-01
Supplement: b805179h.pdf [file b805179h.pdf]

## Supporting information

Table S1: Summary of calculated (GGA-PW91) properties of atomic O adsorption on Pt<sub>x</sub> and Pt(111).

| cluster                | magnetic moment of system | O binding geometry | ZPE-corrected binding energy (eV) | $d_{\text{Pt-O}}$ (Å) | $\nu_{\text{Pt-O}}$ (cm <sup>-1</sup> ) | Bader charge of O (e) |
|------------------------|---------------------------|--------------------|-----------------------------------|-----------------------|-----------------------------------------|-----------------------|
| Pt-O                   | 2                         | -                  | -1.63                             | 1.762                 | 812                                     | -0.48                 |
| Pt <sub>2</sub> -O     | 2                         | apex               | -1.41                             | 1.766                 | 855                                     | -0.61                 |
| Pt <sub>3</sub> -O     | 2                         | apex               | -1.55                             | 1.768                 | 855                                     | -0.65                 |
| Pt <sub>4</sub> -O     | 2                         | apex               | -1.73                             | 1.772                 | 860                                     | -0.65                 |
| Pt <sub>5</sub> -O     | 4                         | apex               | -1.75                             | 1.767                 | 817                                     | -0.65                 |
| Pt <sub>10</sub> -O    | 4                         | apex               | -1.07                             | 1.774                 | 869                                     | -0.69                 |
| Pt(111)-O <sup>a</sup> | 0                         | fcc                | -1.09                             | 2.058                 | 432                                     | -0.80                 |

See Figure 1 for snapshots of the clusters. The free O atom has a magnetic moment of 2 in its ground state.

<sup>a</sup> 1/16 ML coverage.

Table S2: Summary of calculated (GGA-PW91) properties of molecular oxygen (O<sub>2</sub>) adsorption on Pt<sub>x</sub> and Pt(111).

| cluster                             | magnetic moment of system | O <sub>2</sub> binding geometry | ZPE-corrected binding energy (eV) | $d_{\text{O-O}}$ (Å) | $\nu_{\text{O-O}}$ (cm <sup>-1</sup> ) | Bader charge of O <sub>2</sub> (e) |
|-------------------------------------|---------------------------|---------------------------------|-----------------------------------|----------------------|----------------------------------------|------------------------------------|
| O <sub>2</sub>                      | 2                         | -                               | -5.65 <sup>a</sup>                | 1.237                | 1571                                   | -                                  |
| Pt-O <sub>2</sub>                   | 2                         | bent                            | -1.62                             | 1.294                | 1203                                   | -0.34                              |
| Pt <sub>2</sub> -O <sub>2</sub>     | 2                         | $\eta^2$ -O <sub>2</sub>        | -1.43                             | 1.338                | 1126                                   | -0.44                              |
| Pt <sub>3</sub> -O <sub>2</sub>     | 0                         | $\mu$ -O <sub>2</sub>           | -1.63                             | 1.376                | 923                                    | -0.58                              |
| Pt <sub>4</sub> -O <sub>2</sub>     | 0                         | $\mu$ -O <sub>2</sub>           | -2.44                             | 1.409                | 793                                    | -0.68                              |
| Pt <sub>5</sub> -O <sub>2</sub>     | 2                         | $\mu$ -O <sub>2</sub>           | -2.13                             | 1.420                | 743                                    | -0.67                              |
| Pt <sub>10</sub> -O <sub>2</sub>    | 4                         | $\mu$ -O <sub>2</sub>           | -1.33                             | 1.425                | 729                                    | -0.67                              |
| Pt(111)-O <sub>2</sub> <sup>b</sup> | 0                         | top-bridge-top                  | -0.61                             | 1.364                | 853                                    | -0.60                              |

The relevant properties of the free O<sub>2</sub> molecule are included for comparison. See Figure 1 for snapshots of the clusters.

<sup>a</sup> O<sub>2</sub> bond energy.

<sup>b</sup> 1/16 ML coverage.

Table S3: Summary of calculated (GGA-PW91) properties of CO and NO adsorption on Pt<sub>x</sub> clusters and Pt(111).

| cluster                 | magnetic moment of system | CO/NO binding geometry | ZPE-corrected binding energy (eV) | ∠ Pt-Y-O (°) | <i>d</i> <sub>Pt-Y</sub> (Å) | <i>d</i> <sub>Y-O</sub> (Å) | <i>V</i> <sub>Y-O</sub> (cm <sup>-1</sup> ) | <i>V</i> <sub>Pt-YO</sub> (cm <sup>-1</sup> ) | Bader charge of CO/NO (e) |
|-------------------------|---------------------------|------------------------|-----------------------------------|--------------|------------------------------|-----------------------------|---------------------------------------------|-----------------------------------------------|---------------------------|
| CO                      | 0                         | -                      | -10.70 <sup>a</sup>               | -            | -                            | 1.144                       | 2118                                        | -                                             | -                         |
| Pt-CO                   | 0                         | linear                 | -3.46                             | 180          | 1.772                        | 1.165                       | 2028                                        | 558                                           | -0.06                     |
| Pt <sub>2</sub> -CO     | 0                         | bridging               | -2.95                             | 138          | 1.915                        | 1.192                       | 1836                                        | 525                                           | -0.28                     |
| Pt <sub>3</sub> -CO     | 2                         | linear                 | -2.62                             | 178          | 1.844                        | 1.167                       | 2019                                        | 527                                           | -0.25                     |
| Pt <sub>4</sub> -CO     | 2                         | linear                 | -2.62                             | 176          | 1.843                        | 1.167                       | 1996                                        | 518                                           | -0.23                     |
| Pt <sub>5</sub> -CO     | 4                         | linear                 | -2.58                             | 179          | 1.840                        | 1.168                       | 1992                                        | 519                                           | -0.20                     |
| Pt <sub>10</sub> -CO    | 6                         | linear                 | -2.01                             | 179          | 1.830                        | 1.166                       | 2000                                        | 505                                           | -0.20                     |
| Pt(111)-CO <sup>b</sup> | 0                         | perp. atop             | -1.65                             | 180          | 1.862                        | 1.157                       | 2054                                        | 510                                           | -0.15                     |
| NO                      | 1                         | -                      | -6.37 <sup>a</sup>                | -            | -                            | 1.175                       | 1883                                        | -                                             | -                         |
| Pt-NO                   | 1                         | bent                   | -3.19                             | 132          | 1.816                        | 1.189                       | 1736                                        | 624                                           | -0.24                     |
| Pt <sub>2</sub> -NO     | 1                         | linear                 | -3.26                             | 174          | 1.773                        | 1.179                       | 1875                                        | 578                                           | -0.30                     |
| Pt <sub>3</sub> -NO     | 1                         | linear                 | -3.10                             | 178          | 1.773                        | 1.182                       | 1842                                        | 559                                           | -0.36                     |
| Pt <sub>4</sub> -NO     | 1                         | linear                 | -3.27                             | 177          | 1.770                        | 1.186                       | 1833                                        | 595                                           | -0.36                     |
| Pt <sub>5</sub> -NO     | 3                         | linear                 | -3.04                             | 176          | 1.783                        | 1.183                       | 1837                                        | 571                                           | -0.29                     |
| Pt <sub>10</sub> -NO    | 7                         | bent                   | -1.93                             | 135          | 1.866                        | 1.192                       | 1724                                        | 580                                           | -0.22                     |
| Pt(111)-NO <sup>b</sup> | 0                         | perp. fcc              | -1.89                             | -            | 2.083                        | 1.215                       | 1502                                        | 331                                           | -0.50                     |

The relevant properties of the free CO and NO molecules are included for comparison. “Y” = C or N. “perp.” = perpendicular. See Figure 3 for snapshots of the clusters.

<sup>a</sup> CO/NO bond energy.

<sup>b</sup> <sup>1</sup>/<sub>16</sub> ML coverage.

Table S4: Summary of calculated (GGA-PW91) properties of CO co-adsorbed with O<sub>2</sub>, 2O, and O and CO<sub>2</sub> co-adsorbed with O on Pt<sub>x</sub> (x = 1-5 and 10) and Pt(111).

| cluster                                 | magnetic moment of system | diff. $\nu_{C-O}$ (cm <sup>-1</sup> )   | diff. $\nu_{Pt-CO}$ (cm <sup>-1</sup> ) | diff. $\nu_{O-O}/\nu_{Pt-O}$ (cm <sup>-1</sup> ) | Bader charge diff. of CO (e) | Bader charge diff. of O/O <sub>2</sub> /2O (e) |
|-----------------------------------------|---------------------------|-----------------------------------------|-----------------------------------------|--------------------------------------------------|------------------------------|------------------------------------------------|
| O <sub>2</sub> -Pt-CO                   | 2                         | 35                                      | 3                                       | 48                                               | -0.08                        | 0.03                                           |
| O <sub>2</sub> -Pt <sub>2</sub> -CO     | 0                         | 44                                      | -22                                     | 72                                               | 0.11                         | 0.06                                           |
| O <sub>2</sub> -Pt <sub>3</sub> -CO     | 0                         | 6                                       | 1                                       | 356                                              | 0.03                         | 0.20                                           |
| O <sub>2</sub> -Pt <sub>4</sub> -CO     | 0                         | 11                                      | -10                                     | -15                                              | 0.01                         | 0.04                                           |
| O <sub>2</sub> -Pt <sub>5</sub> -CO     | 2                         | 20                                      | 18                                      | -6                                               | 0.01                         | 0.00                                           |
| O <sub>2</sub> -Pt <sub>10</sub> -CO    | 4                         | 9                                       | 43                                      | 91                                               | 0.05                         | 0.03                                           |
| Pt(111)-CO+O <sub>2</sub> <sup>a</sup>  | 0                         | -11                                     | 10                                      | -6                                               | 0.13                         | 0.04                                           |
| 2O-Pt-CO                                | 2                         | 49                                      | -58                                     |                                                  | 0.02                         | 0.22                                           |
| 2O-Pt <sub>2</sub> -CO                  | 0                         | 207                                     | -20                                     |                                                  | 0.13                         | 0.09                                           |
| 2O-Pt <sub>3</sub> -CO                  | 0                         | 8                                       | -22                                     |                                                  | 0.08                         | 0.03                                           |
| 2O-Pt <sub>4</sub> -CO                  | 0                         | 44                                      | 9                                       |                                                  | 0.10                         | -0.07                                          |
| 2O-Pt <sub>5</sub> -CO                  | 2                         | 49                                      | -11                                     |                                                  | 0.12                         | 0.00                                           |
| 2O-Pt <sub>10</sub> -CO                 | 2                         | 17                                      | 20                                      |                                                  | 0.07                         | -0.03                                          |
| Pt(111)-CO+2O <sup>b</sup>              | 0                         | -11                                     | -20                                     |                                                  | 0.03                         | -0.01                                          |
| O-Pt-CO                                 | 2                         | 16                                      | -76                                     | -125                                             | -0.04                        | -0.01                                          |
| O-Pt <sub>2</sub> -CO                   | 2                         | 194                                     | 29                                      | -204                                             | 0.10                         | -0.04                                          |
| O-Pt <sub>3</sub> -CO                   | 2                         | 15                                      | -2                                      | -48                                              | 0.05                         | 0.03                                           |
| O-Pt <sub>4</sub> -CO                   | 2                         | 37                                      | 0                                       | -17                                              | 0.05                         | 0.03                                           |
| O-Pt <sub>5</sub> -CO                   | 2                         | 7                                       | -6                                      | 53                                               | 0.05                         | 0.04                                           |
| O-Pt <sub>10</sub> -CO                  | 2                         | 18                                      | 20                                      | -40                                              | 0.01                         | 0.01                                           |
| Pt(111)-CO+O <sup>a</sup>               | 0                         | -7                                      | -43                                     | 85                                               | 0.05                         | 0.05                                           |
| cluster                                 | magnetic moment of system | diff. $\nu_{asOCO}$ (cm <sup>-1</sup> ) | diff. $\nu_{Pt-O}$ (cm <sup>-1</sup> )  | Bader charge diff. of CO <sub>2</sub> (e)        | Bader charge diff. of O (e)  |                                                |
| O-Pt-CO <sub>2</sub>                    | 2                         | 104                                     | -29                                     | 0.05                                             | -0.04                        |                                                |
| O-Pt <sub>2</sub> -CO <sub>2</sub>      | 0                         | -11                                     | -151                                    | -0.01                                            | -0.10                        |                                                |
| O-Pt <sub>3</sub> -CO <sub>2</sub>      | 2                         | 32                                      | -34                                     | 0.05                                             | -0.14                        |                                                |
| O-Pt <sub>4</sub> -CO <sub>2</sub>      | 2                         | 28                                      | -30                                     | 0.05                                             | 0.03                         |                                                |
| O-Pt <sub>5</sub> -CO <sub>2</sub>      | 0                         | 5                                       | 64                                      | 0.05                                             | 0.02                         |                                                |
| O-Pt <sub>10</sub> -CO <sub>2</sub>     | 2                         | 6                                       | 12                                      | 0.04                                             | 0.02                         |                                                |
| Pt(111)-CO <sub>2</sub> +O <sup>a</sup> | 0                         | 0                                       | 0                                       | -0.03                                            | 0.06                         |                                                |

Differences in vibrational frequency and Bader charge are defined as (co-adsorbates - individual adsorbates). Thus positive values indicated co-adsorbates having blueshifted frequencies or possessing less charge. See Figures 4 and 6 for snapshots of the clusters.

<sup>a</sup> 1/16 ML coverage each for O, O<sub>2</sub>, CO, and CO<sub>2</sub>. <sup>b</sup> 1/16 ML coverage for CO and 1/8 ML coverage for O.

Table S5: Summary of calculated (GGA-PW91) properties of NO co-adsorbed with O<sub>2</sub>, 2O, and O and NO<sub>2</sub> co-adsorbed with O on Pt<sub>x</sub> (x = 1-5 and 10) and Pt(111).

| cluster                                 | magnetic moment of system | diff. $\nu_{N-O}$ (cm <sup>-1</sup> )   | diff. $\nu_{Pt-NO}$ (cm <sup>-1</sup> ) | diff. $\nu_{O-O}/\nu_{Pt-O}$ (cm <sup>-1</sup> ) | Bader charge diff. of NO (e) | Bader charge diff. of O (e) |
|-----------------------------------------|---------------------------|-----------------------------------------|-----------------------------------------|--------------------------------------------------|------------------------------|-----------------------------|
| O <sub>2</sub> -Pt-NO                   | 1                         | 156                                     | 2                                       | -13                                              | 0.05                         | -0.08                       |
| O <sub>2</sub> -Pt <sub>2</sub> -NO     | 1                         | -37                                     | 56                                      | 78                                               | 0.06                         | 0.09                        |
| O <sub>2</sub> -Pt <sub>3</sub> -NO     | 1                         | -97                                     | 72                                      | -46                                              | 0.10                         | 0.03                        |
| O <sub>2</sub> -Pt <sub>4</sub> -NO     | 1                         | 8                                       | -4                                      | 38                                               | 0.07                         | 0.01                        |
| O <sub>2</sub> -Pt <sub>5</sub> -NO     | 3                         | 11                                      | 10                                      | 72                                               | 0.04                         | 0.04                        |
| O <sub>2</sub> -Pt <sub>10</sub> -NO    | 3                         | 35                                      | -31                                     | 21                                               | -0.03                        | 0.00                        |
| Pt(111)-NO+O <sub>2</sub> <sup>a</sup>  | 0                         | 36                                      | 11                                      | 46                                               | 0.04                         | 0.06                        |
| 2O-Pt-NO                                | 1                         | 31                                      | -112                                    |                                                  | 0.25                         | 0.25                        |
| 2O-Pt <sub>2</sub> -NO                  | 1                         | 37                                      | 11                                      |                                                  | 0.07                         | 0.04                        |
| 2O-Pt <sub>3</sub> -NO                  | 1                         | 45                                      | 25                                      |                                                  | 0.12                         | 0.01                        |
| 2O-Pt <sub>4</sub> -NO                  | 1                         | -102                                    | -12                                     |                                                  | 0.12                         | -0.04                       |
| 2O-Pt <sub>5</sub> -NO                  | 1                         | -25                                     | 1                                       |                                                  | 0.02                         | 0.01                        |
| 2O-Pt <sub>10</sub> -NO                 | 1                         | 56                                      | -33                                     |                                                  | 0.01                         | -0.04                       |
| Pt(111)-NO+2O <sup>b</sup>              | 0                         | 31                                      | 14                                      |                                                  | 0.07                         | -0.01                       |
| O-Pt-NO                                 | 1                         | 152                                     | -43                                     | -9                                               | -0.05                        | -0.01                       |
| O-Pt <sub>2</sub> -NO                   | 1                         | 8                                       | 19                                      | -179                                             | -0.03                        | -0.11                       |
| O-Pt <sub>3</sub> -NO                   | 1                         | 46                                      | 20                                      | -37                                              | 0.11                         | 0.08                        |
| O-Pt <sub>4</sub> -NO                   | 1                         | 8                                       | -43                                     | -49                                              | 0.08                         | 0.06                        |
| O-Pt <sub>5</sub> -NO                   | 1                         | 6                                       | -6                                      | 17                                               | 0.04                         | 0.04                        |
| O-Pt <sub>10</sub> -NO                  | 3                         | 19                                      | -27                                     | -20                                              | 0.02                         | 0.02                        |
| Pt(111)-NO+O <sup>a</sup>               | 0                         | 32                                      | -10                                     | -7                                               | 0.03                         | 0.06                        |
| cluster                                 | magnetic moment of system | diff. $\nu_{asONO}$ (cm <sup>-1</sup> ) | diff. $\nu_{Pt-O}$ (cm <sup>-1</sup> )  | Bader charge diff. of NO <sub>2</sub> (e)        | Bader charge diff. of O (e)  |                             |
| O-Pt-NO <sub>2</sub>                    | 1                         | 183                                     | 9                                       | 0.01                                             | -0.10                        |                             |
| O-Pt <sub>2</sub> -NO <sub>2</sub>      | 1                         | 34                                      | -141                                    | -0.04                                            | -0.04                        |                             |
| O-Pt <sub>3</sub> -NO <sub>2</sub>      | 1                         | -274                                    | 0                                       | -0.04                                            | 0.05                         |                             |
| O-Pt <sub>4</sub> -NO <sub>2</sub>      | 1                         | -12                                     | -24                                     | 0.06                                             | 0.06                         |                             |
| O-Pt <sub>5</sub> -NO <sub>2</sub>      | 3                         | 7                                       | 4                                       | 0.02                                             | 0.03                         |                             |
| O-Pt <sub>10</sub> -NO <sub>2</sub>     | 3                         | 44                                      | -28                                     | -0.10                                            | 0.03                         |                             |
| Pt(111)-NO <sub>2</sub> +O <sup>a</sup> | 0                         | 14                                      | -10                                     | 0.03                                             | 0.06                         |                             |

Differences in vibrational frequency and Bader charge are defined as (co-adsorbates - individual adsorbates). Thus positive values indicated co-adsorbates having blueshifted frequencies or possessing less charge. See Figures 4 and 6 for snapshots of the clusters.

<sup>a</sup>  $1/16$  ML coverage each for O, O<sub>2</sub>, NO, and NO<sub>2</sub>. <sup>b</sup>  $1/16$  ML coverage for NO and  $1/8$  ML coverage for O.

Table S6: Summary of calculated (DFT/PW91) properties of CO<sub>2</sub> and NO<sub>2</sub> adsorption on Pt<sub>x</sub> (x = 1-5 and 10) and Pt(111).

| cluster                              | magnetic moment of system | CO <sub>2</sub> /NO <sub>2</sub> binding geometry | ZPE-corrected binding energy (eV) | ∠ O-Y-O (°) | <i>d</i> <sub>Y-O</sub> (Å) | <i>ν</i> <sub>Y-O</sub> (cm <sup>-1</sup> ) | <i>ν</i> <sub>Y-O</sub> (cm <sup>-1</sup> ) | Bader charge of CO <sub>2</sub> /NO <sub>2</sub> (e) |
|--------------------------------------|---------------------------|---------------------------------------------------|-----------------------------------|-------------|-----------------------------|---------------------------------------------|---------------------------------------------|------------------------------------------------------|
| CO <sub>2</sub>                      | 0                         | -                                                 | -3.24 <sup>a</sup>                | 180         | 1.173                       | 2357                                        | 1325                                        | -                                                    |
| Pt-CO <sub>2</sub>                   | 0                         | $\eta^2$ -C,O                                     | -0.92                             | 145         | 1.290; 1.193                | 1919                                        | 1092                                        | -0.32                                                |
| Pt <sub>2</sub> -CO <sub>2</sub>     | 2                         | $\eta^2$ -C,O                                     | -0.62                             | 148         | 1.261; 1.193                | 1966                                        | 1143                                        | -0.33                                                |
| Pt <sub>3</sub> -CO <sub>2</sub>     | 2                         | $\eta^2$ -C,O                                     | -0.74                             | 147         | 1.270; 1.199                | 1935                                        | 1138                                        | -0.36                                                |
| Pt <sub>4</sub> -CO <sub>2</sub>     | 2                         | $\mu$ -C,O                                        | -0.81                             | 136         | 1.279; 1.226                | 1716                                        | 1146                                        | -0.48                                                |
| Pt <sub>5</sub> -CO <sub>2</sub>     | 4                         | $\mu$ -C,O                                        | -0.89                             | 134         | 1.268; 1.234                | 1685                                        | 1191                                        | -0.51                                                |
| Pt <sub>10</sub> -CO <sub>2</sub>    | 6                         | $\mu$ -C,O                                        | -0.11                             | 132         | 1.282; 1.227                | 1693                                        | 1175                                        | -0.51                                                |
| Pt(111)-CO <sub>2</sub> <sup>b</sup> | 0                         | -                                                 | 0.00                              | 180         | 1.173                       | 2357                                        | 1325                                        | 0                                                    |
| NO <sub>2</sub>                      | 1                         | -                                                 | -1.06 <sup>a</sup>                | 134         | 1.213; 1.213                | 1658                                        | 1324                                        | -                                                    |
| Pt-NO <sub>2</sub>                   | 1                         | $\eta$ -N                                         | -2.55                             | 128         | 1.239; 1.239                | 1507                                        | 1298                                        | -0.33                                                |
| Pt <sub>2</sub> -NO <sub>2</sub>     | 1                         | $\eta^2$ -N,O                                     | -2.08                             | 130         | 1.264; 1.217                | 1614                                        | 1225                                        | -0.39                                                |
| Pt <sub>3</sub> -NO <sub>2</sub>     | 1                         | $\eta^2$ -N,O                                     | -2.24                             | 127         | 1.290; 1.220                | 1590                                        | 1143                                        | -0.43                                                |
| Pt <sub>4</sub> -NO <sub>2</sub>     | 1                         | $\mu$ -N,O                                        | -2.51                             | 119         | 1.352; 1.220                | 1559                                        | 903                                         | -0.57                                                |
| Pt <sub>5</sub> -NO <sub>2</sub>     | 1                         | $\mu$ -N,O                                        | -2.50                             | 118         | 1.362; 1.221                | 1560                                        | 891                                         | -0.57                                                |
| Pt <sub>10</sub> -NO <sub>2</sub>    | 5                         | $\eta$ -N                                         | -1.51                             | 125         | 1.237; 1.242                | 1520                                        | 1304                                        | -0.43                                                |
| Pt(111)-NO <sub>2</sub> <sup>b</sup> | 0                         | $\mu$ -N,O                                        | -1.25                             | 119         | 1.316; 1.219                | 1541                                        | 978                                         | -0.45                                                |

The normal modes shown (*ν*) are the former asymmetric and symmetric stretch modes. The relevant properties of the free CO<sub>2</sub> and NO<sub>2</sub> molecules are included for comparison. "Y" = C or N. See Figure 5 for snapshots of the clusters.

<sup>a</sup> Formation energies from CO+ $1/2$ O<sub>2</sub> and NO+ $1/2$ O<sub>2</sub>.

<sup>b</sup>  $1/16$  ML coverage.
